# Supplementary material
Source: publisher figshare collection journal article supplement (https://acs.figshare.com/ndownloader/files/14244500)
Supplement: Supplementary file 1 [file 14244500]

## Sheet: all
Table S10. Molecular polarizabilities calculated as single molecules and as solvents.
Solvent	Expt.	#Mol	Set A				Universal Screening Factor (USF)								Variable Screening Factor (VSF)
			Thole-Linear		Thole-Exponential		Thole-Linear		Thole-Exponential		Thole-Amoeba		pGM		Thole-Linear		Thole-Exponential		Thole-Amoeba		pGM		pGM2 (scaled pGM)
			Am	As	Am	As	Am	As	Am	As	Am	As	Am	As	Am	As	Am	As	Am	As	Am	As	Am	As
table1_3	57.7	233	57.98±0.00	58.07±0.01	58.40±0.00	58.07±0.01	58.48±0.02	57.40±0.03	59.49±0.02	57.67±0.03	57.96±0.03	56.86±0.04	58.49±0.02	57.31±0.03	56.75±0.02	55.91±0.03	59.44±0.01	56.52±0.03	59.76±0.02	58.58±0.04	59.08±0.02	57.47±0.03	60.48±0.02	58.76±0.03
table1_4	48.59	333	48.88±0.00	49.02±0.01	48.85±0.00	48.89±0.01	48.74±0.01	48.81±0.02	48.95±0.01	48.74±0.02	48.81±0.01	48.82±0.02	48.46±0.01	48.47±0.02	48.94±0.01	49.05±0.02	48.76±0.01	48.09±0.01	49.21±0.01	49.27±0.01	48.73±0.01	48.50±0.01	49.96±0.01	49.71±0.01
table1_5	70.45	333	69.81±0.00	70.37±0.03	69.69±0.00	68.97±0.02	70.18±0.01	69.60±0.03	69.21±0.01	67.20±0.02	69.89±0.01	69.16±0.03	69.87±0.01	69.05±0.03	68.46±0.01	67.97±0.03	69.78±0.01	68.10±0.03	69.59±0.01	68.92±0.03	69.46±0.01	68.63±0.03	71.32±0.01	70.43±0.03
table1_13	56.55	445	56.57±0.00	56.97±0.01	56.47±0.00	55.89±0.01	56.62±0.01	56.14±0.02	56.25±0.01	54.64±0.02	56.64±0.01	56.06±0.02	56.58±0.01	55.91±0.02	55.49±0.00	55.07±0.02	56.59±0.01	54.86±0.02	56.29±0.01	55.71±0.02	56.08±0.01	55.23±0.01	57.56±0.01	56.64±0.02
table1_15	115.06	297	114.96±0.01	114.60±0.03	115.00±0.00	113.85±0.02	115.21±0.02	110.73±0.07	115.53±0.02	109.88±0.06	115.40±0.04	110.90±0.07	115.31±0.04	110.71±0.07	114.65±0.04	110.63±0.07	115.34±0.02	107.86±0.06	115.82±0.03	111.59±0.07	114.78±0.04	109.46±0.06	117.26±0.04	111.68±0.06
table1_16	120.19	297	121.36±0.01	120.36±0.03	120.83±0.00	119.23±0.03	124.12±0.01	117.93±0.05	121.51±0.02	114.74±0.06	124.53±0.02	118.27±0.06	122.93±0.02	116.83±0.06	123.96±0.03	118.22±0.05	123.02±0.02	113.80±0.05	123.24±0.02	117.46±0.05	123.18±0.02	116.09±0.05	125.89±0.03	118.45±0.05
table1_25	96.5	357	96.78±0.01	97.54±0.04	97.01±0.00	95.96±0.03	97.81±0.01	93.28±0.08	99.03±0.01	92.52±0.07	98.02±0.02	93.37±0.08	99.28±0.02	94.32±0.08	98.59±0.02	93.87±0.09	102.23±0.01	95.31±0.10	100.69±0.02	95.57±0.10	102.52±0.02	96.61±0.10	104.83±0.02	98.67±0.11
table1_27	70.32	357	71.16±0.00	71.88±0.03	71.30±0.00	71.37±0.03	71.20±0.01	68.67±0.06	72.09±0.01	68.68±0.06	71.76±0.02	69.17±0.06	71.79±0.02	69.15±0.06	71.62±0.02	69.29±0.05	71.66±0.01	68.10±0.05	71.63±0.02	69.31±0.05	70.93±0.02	68.32±0.05	72.39±0.02	69.69±0.05
table1_33	111.95	219	113.15±0.00	113.11±0.08	112.54±0.00	109.99±0.05	114.40±0.02	107.47±0.10	113.15±0.02	103.80±0.09	115.29±0.04	108.00±0.11	114.48±0.03	107.00±0.10	116.48±0.04	108.78±0.12	122.09±0.04	110.99±0.15	119.69±0.05	111.13±0.14	120.09±0.03	110.58±0.14	123.01±0.03	113.04±0.15
table1_34	97.04	237	97.38±0.00	98.17±0.07	97.23±0.00	96.22±0.05	98.57±0.02	93.38±0.11	99.71±0.01	92.63±0.11	98.82±0.03	93.46±0.12	100.13±0.03	94.44±0.12	99.77±0.02	94.16±0.12	104.26±0.02	96.04±0.14	102.27±0.03	96.03±0.13	104.62±0.03	97.35±0.14	107.03±0.03	99.45±0.15
table1_38	45.82	417	44.85±0.00	45.12±0.01	45.34±0.00	45.28±0.01	44.68±0.01	44.33±0.02	45.58±0.01	44.68±0.02	44.58±0.02	44.17±0.02	44.77±0.01	44.33±0.02	44.80±0.01	44.63±0.01	45.71±0.01	43.48±0.01	45.41±0.01	45.23±0.01	45.44±0.01	44.43±0.01	46.58±0.01	45.47±0.01
table1_41	70.72	249	71.54±0.00	72.07±0.02	71.66±0.00	71.57±0.02	71.40±0.01	69.90±0.06	71.95±0.02	69.44±0.06	72.25±0.03	70.65±0.07	71.75±0.03	70.09±0.07	71.68±0.02	70.42±0.05	70.63±0.02	67.31±0.05	71.05±0.02	69.85±0.05	69.95±0.03	68.18±0.05	71.51±0.03	69.65±0.05
table1_43	69.31	213	71.16±0.00	72.05±0.05	71.30±0.00	71.53±0.04	71.17±0.01	68.77±0.09	72.08±0.02	68.82±0.09	71.73±0.03	69.26±0.09	71.76±0.02	69.27±0.09	71.61±0.02	69.41±0.08	71.67±0.02	68.21±0.08	71.61±0.02	69.42±0.08	70.93±0.03	68.44±0.08	72.39±0.03	69.81±0.09
table1_44	58.24	503	57.40±0.00	57.49±0.01	57.76±0.00	57.46±0.01	56.50±0.01	56.04±0.01	57.44±0.01	56.34±0.01	56.53±0.02	55.99±0.02	56.65±0.02	56.08±0.02	56.91±0.01	56.60±0.01	57.61±0.01	54.79±0.01	57.48±0.01	57.16±0.01	57.38±0.01	56.05±0.01	58.79±0.01	57.34±0.01
table1_49	130.72	237	126.65±0.01	126.56±0.08	126.21±0.00	124.59±0.06	129.34±0.02	121.03±0.16	129.34±0.02	119.36±0.15	128.41±0.04	120.32±0.15	129.57±0.03	121.13±0.15	129.39±0.03	121.41±0.15	132.01±0.02	121.12±0.16	130.41±0.04	122.22±0.16	133.10±0.03	123.42±0.17	135.90±0.03	125.86±0.17
table1_55	151.77	274	148.37±0.02	146.69±0.12	148.16±0.00	143.69±0.07	143.79±0.02	133.67±0.09	146.83±0.01	133.76±0.09	148.52±0.03	138.07±0.10	145.54±0.03	134.99±0.09	143.87±0.05	133.60±0.10	148.05±0.02	134.87±0.11	149.76±0.03	138.64±0.11	148.73±0.02	136.76±0.11	152.07±0.03	139.59±0.11
table1_59	85.16	237	83.48±0.01	83.71±0.02	83.56±0.00	83.41±0.01	81.30±0.01	80.97±0.03	81.34±0.01	80.30±0.03	81.65±0.02	81.28±0.03	81.42±0.02	80.99±0.03	81.47±0.02	81.22±0.03	81.88±0.01	78.32±0.02	81.44±0.01	81.22±0.02	81.43±0.02	79.87±0.02	83.37±0.02	81.68±0.02
table1_67	35.09	389	35.40±0.00	35.50±0.01	35.41±0.00	35.46±0.01	35.60±0.01	36.04±0.02	35.45±0.01	35.29±0.01	35.60±0.01	35.87±0.02	35.36±0.01	35.56±0.02	35.63±0.01	35.97±0.01	35.55±0.01	34.56±0.01	35.68±0.01	35.81±0.01	35.64±0.01	35.20±0.01	36.56±0.01	36.08±0.01
table1_71	82.6	233	84.87±0.00	85.20±0.05	84.89±0.00	84.80±0.04	87.06±0.02	83.40±0.08	86.50±0.02	82.41±0.08	88.54±0.02	84.64±0.09	87.12±0.02	83.40±0.09	87.96±0.02	84.49±0.08	88.31±0.02	83.60±0.10	88.53±0.02	84.96±0.09	87.35±0.03	83.53±0.09	89.21±0.03	85.25±0.10
table1_73	104.46	349	102.98±0.01	102.50±0.02	103.27±0.00	102.20±0.02	107.82±0.02	102.10±0.08	104.29±0.01	98.39±0.07	106.93±0.02	101.38±0.08	105.20±0.02	99.88±0.08	104.18±0.03	99.45±0.07	104.91±0.01	97.11±0.07	106.04±0.02	100.77±0.08	104.60±0.02	98.62±0.07	106.93±0.02	100.66±0.07
table1_75	90.43	297	90.25±0.01	90.04±0.03	90.61±0.00	89.73±0.02	93.13±0.02	88.68±0.06	91.13±0.01	86.14±0.05	92.49±0.02	88.18±0.05	91.54±0.02	87.30±0.05	90.19±0.03	86.49±0.05	91.00±0.01	84.75±0.05	91.69±0.02	87.67±0.06	90.72±0.02	86.05±0.05	92.70±0.02	87.81±0.05
table1_77	126.33	359	125.91±0.01	125.67±0.07	125.00±0.00	122.45±0.04	128.12±0.02	120.07±0.09	125.80±0.01	115.73±0.08	129.18±0.02	120.74±0.10	127.72±0.02	119.25±0.09	130.40±0.03	121.63±0.11	135.78±0.03	123.35±0.13	133.67±0.02	124.00±0.12	134.02±0.02	123.23±0.12	137.29±0.02	125.98±0.13
table1_81	91.37	197	90.09±0.01	90.13±0.04	90.55±0.00	89.89±0.03	93.42±0.03	89.19±0.09	91.46±0.02	86.74±0.08	92.98±0.03	88.86±0.09	91.94±0.03	87.92±0.09	90.86±0.03	87.28±0.08	91.24±0.02	85.28±0.08	92.66±0.03	88.66±0.09	91.02±0.03	86.61±0.09	93.01±0.03	88.38±0.09
table1_88	86.24	263	86.19±0.01	86.68±0.04	86.46±0.00	85.08±0.03	86.97±0.01	82.86±0.08	86.80±0.02	80.79±0.07	87.56±0.03	83.30±0.08	87.21±0.02	82.74±0.07	86.21±0.02	82.11±0.07	89.71±0.02	83.36±0.08	89.58±0.03	84.80±0.09	88.85±0.02	83.68±0.08	90.89±0.03	85.48±0.08
table1_93	78.28	237	78.38±0.00	79.14±0.03	78.83±0.00	78.24±0.03	79.12±0.02	75.82±0.07	80.02±0.01	75.19±0.07	79.32±0.03	75.95±0.07	80.02±0.03	76.42±0.07	77.99±0.02	74.77±0.07	81.03±0.02	75.92±0.08	80.88±0.03	77.11±0.09	81.22±0.02	77.05±0.09	83.03±0.02	78.67±0.09
table1_102	71.8	207	71.50±0.01	71.53±0.02	71.35±0.00	71.15±0.01	69.65±0.01	70.19±0.03	69.18±0.02	68.66±0.02	69.47±0.03	69.85±0.04	69.27±0.03	69.46±0.03	69.47±0.02	69.86±0.03	69.70±0.01	66.72±0.01	69.79±0.02	69.92±0.02	69.92±0.02	68.66±0.02	71.64±0.02	70.26±0.02
table1_104	68.36	333	67.31±0.00	67.36±0.02	67.14±0.00	66.97±0.01	65.28±0.01	65.19±0.02	65.11±0.01	64.57±0.02	65.25±0.02	65.17±0.02	65.17±0.02	65.05±0.02	65.25±0.02	65.19±0.02	65.73±0.01	63.24±0.01	65.61±0.01	65.52±0.02	65.94±0.01	64.98±0.01	67.58±0.01	66.53±0.01
table1_108	78.08	247	77.51±0.01	77.90±0.03	78.00±0.00	77.63±0.02	79.04±0.01	76.11±0.08	78.45±0.02	74.69±0.06	78.78±0.03	75.92±0.07	78.46±0.03	75.57±0.07	76.99±0.02	74.51±0.07	77.52±0.02	73.12±0.06	78.48±0.03	75.77±0.08	77.32±0.02	74.24±0.06	78.97±0.02	75.75±0.06
table1_112	79.97	293	80.41±0.01	80.65±0.02	80.09±0.00	80.05±0.02	78.96±0.01	78.89±0.03	78.53±0.02	77.95±0.03	79.26±0.02	79.13±0.03	78.92±0.02	78.78±0.03	78.36±0.02	78.29±0.03	78.66±0.01	76.37±0.02	79.53±0.02	79.35±0.03	79.25±0.02	78.35±0.03	81.14±0.02	80.17±0.03
table1_113	90.02	353	90.20±0.01	90.22±0.04	90.47±0.00	89.79±0.03	91.58±0.01	87.99±0.06	90.59±0.02	86.14±0.06	91.76±0.03	88.16±0.07	91.07±0.02	87.44±0.06	89.73±0.02	86.57±0.06	90.45±0.02	84.83±0.06	91.06±0.03	87.66±0.07	90.53±0.02	86.43±0.06	92.49±0.02	88.19±0.06
table1_114	86.11	307	86.20±0.00	86.98±0.04	86.44±0.00	85.34±0.03	86.52±0.01	82.83±0.07	86.22±0.01	80.64±0.06	86.88±0.02	83.08±0.07	86.59±0.02	82.56±0.07	85.78±0.01	82.04±0.07	89.14±0.02	83.18±0.08	88.96±0.02	84.63±0.08	88.25±0.02	83.52±0.08	90.27±0.02	85.33±0.08
table1_116	91.78	237	88.21±0.01	88.79±0.05	88.25±0.00	87.54±0.04	89.84±0.02	86.41±0.14	89.95±0.01	84.67±0.12	89.58±0.03	85.98±0.13	90.09±0.03	86.19±0.13	89.79±0.03	86.22±0.13	92.04±0.01	85.84±0.14	91.08±0.03	87.06±0.13	92.15±0.03	87.06±0.14	94.18±0.03	88.87±0.14
table1_125	77.61	297	77.58±0.00	77.76±0.03	77.99±0.00	77.40±0.02	78.47±0.01	75.49±0.05	78.41±0.02	74.46±0.05	78.74±0.02	75.75±0.05	78.53±0.02	75.47±0.05	76.88±0.02	74.26±0.05	77.60±0.01	72.97±0.04	78.32±0.02	75.47±0.05	77.61±0.02	74.29±0.04	79.27±0.02	75.79±0.04
table1_126	89.08	197	87.43±0.01	87.74±0.04	87.48±0.00	86.97±0.03	89.58±0.02	86.08±0.10	88.62±0.02	84.07±0.08	89.26±0.04	85.75±0.09	88.81±0.04	85.24±0.09	88.81±0.04	85.66±0.09	88.70±0.03	82.98±0.08	88.65±0.03	85.43±0.09	88.55±0.04	84.29±0.09	90.43±0.04	85.98±0.09
table1_139	52.97	417	52.74±0.00	52.85±0.01	52.67±0.00	52.41±0.01	53.70±0.01	53.13±0.04	53.10±0.01	51.69±0.03	53.63±0.02	52.83±0.04	53.59±0.02	52.73±0.04	52.72±0.01	52.18±0.04	53.41±0.01	50.77±0.03	52.81±0.01	52.30±0.04	53.24±0.01	51.74±0.02	54.51±0.01	52.90±0.02
table1_142	40.56	357	40.30±0.00	40.52±0.01	40.26±0.00	40.06±0.01	40.90±0.01	40.57±0.02	40.82±0.01	39.55±0.02	40.65±0.02	40.19±0.02	41.10±0.01	40.48±0.02	39.78±0.01	39.33±0.02	41.00±0.01	38.74±0.02	40.41±0.01	39.76±0.03	40.90±0.01	39.56±0.02	41.87±0.01	40.45±0.02
table1_147	29.96	693	30.86±0.00	31.08±0.01	31.01±0.00	30.90±0.00	31.55±0.00	31.06±0.01	30.99±0.01	29.94±0.01	31.61±0.01	31.10±0.01	31.32±0.01	30.71±0.01	31.00±0.00	30.45±0.01	30.83±0.00	29.37±0.01	31.00±0.01	30.39±0.01	30.75±0.01	30.00±0.01	31.49±0.01	30.70±0.01
table1_150	82.06	297	80.24±0.00	80.89±0.04	80.28±0.00	79.80±0.02	80.92±0.01	78.05±0.08	80.71±0.01	76.43±0.07	80.17±0.03	77.40±0.06	80.62±0.02	77.58±0.06	80.57±0.02	78.03±0.06	80.76±0.01	75.59±0.06	79.52±0.02	77.08±0.06	80.41±0.02	76.70±0.05	82.07±0.02	78.20±0.06
table1_152	70.45	299	70.39±0.00	71.04±0.03	70.55±0.00	70.40±0.02	69.86±0.01	67.98±0.05	71.05±0.01	68.05±0.05	69.87±0.03	68.01±0.05	70.45±0.03	68.46±0.05	69.81±0.02	68.19±0.05	69.62±0.02	66.46±0.04	69.44±0.03	67.90±0.05	69.12±0.02	67.15±0.04	70.53±0.03	68.48±0.05
table1_153	84.83	237	83.75±0.00	84.34±0.05	83.98±0.00	83.55±0.04	85.34±0.01	81.08±0.09	86.68±0.01	80.77±0.10	85.25±0.02	81.07±0.09	86.34±0.02	81.69±0.10	85.24±0.02	80.93±0.09	86.95±0.01	80.52±0.11	86.48±0.03	81.85±0.10	88.15±0.03	82.54±0.12	89.96±0.03	84.15±0.13
table1_159	91.24	219	91.69±0.01	92.26±0.06	91.50±0.00	90.34±0.04	91.85±0.01	87.87±0.10	91.95±0.02	86.14±0.09	92.29±0.03	88.19±0.11	92.22±0.02	87.91±0.10	92.77±0.02	88.64±0.10	95.24±0.02	88.91±0.12	94.07±0.03	89.68±0.12	94.05±0.03	89.01±0.12	96.18±0.03	90.92±0.12
table1_160	80.1	440	80.10±0.00	79.78±0.06	80.11±0.00	77.47±0.02	81.27±0.00	79.51±0.03	76.71±0.01	71.99±0.01	81.29±0.01	79.24±0.03	78.22±0.01	75.92±0.02	78.68±0.01	77.20±0.03	80.23±0.01	76.92±0.03	80.18±0.01	78.31±0.03	77.27±0.01	75.34±0.03	79.44±0.01	77.35±0.03
table1_161	78.75	249	77.97±0.00	78.44±0.04	78.18±0.00	76.57±0.02	80.03±0.00	78.76±0.05	76.90±0.01	73.39±0.02	79.27±0.01	77.77±0.05	78.16±0.01	76.51±0.04	77.13±0.00	76.10±0.04	78.40±0.00	76.30±0.04	78.13±0.01	76.88±0.05	77.66±0.01	76.49±0.04	79.85±0.01	78.60±0.04
table1_164	57.43	847	52.16±0.00	52.03±0.03	52.38±0.00	50.46±0.01	50.10±0.01	49.05±0.01	54.16±0.00	49.53±0.02	50.09±0.01	48.71±0.02	54.07±0.01	51.70±0.02	52.61±0.01	50.76±0.02	57.65±0.00	53.41±0.04	55.02±0.02	52.96±0.03	58.97±0.01	55.75±0.04	60.45±0.01	57.09±0.04
table1_165	71.13	293	70.34±0.00	71.08±0.03	70.61±0.00	69.57±0.01	72.48±0.00	71.49±0.03	70.63±0.01	67.85±0.02	71.66±0.01	70.48±0.03	71.54±0.02	70.26±0.03	69.72±0.00	68.92±0.02	70.94±0.00	69.26±0.03	70.45±0.01	69.47±0.03	71.02±0.01	70.12±0.02	73.02±0.01	72.06±0.03
table1_166	43.19	449	44.03±0.00	44.43±0.01	44.23±0.00	43.73±0.01	45.23±0.00	44.37±0.02	44.71±0.01	42.73±0.01	45.25±0.01	44.32±0.02	45.03±0.01	43.94±0.02	44.03±0.01	43.12±0.02	44.46±0.01	42.50±0.02	44.58±0.01	43.50±0.02	44.10±0.01	42.94±0.02	45.21±0.01	43.99±0.02
table1_168	54.53	587	55.10±0.01	55.65±0.02	55.34±0.00	54.56±0.01	54.30±0.01	53.34±0.02	56.35±0.01	53.74±0.02	54.79±0.01	53.70±0.02	56.08±0.01	54.74±0.02	54.28±0.01	53.18±0.02	57.94±0.02	55.51±0.03	55.68±0.01	54.39±0.02	57.36±0.02	55.63±0.03	58.74±0.02	56.93±0.03
table1_169	86.65	237	86.25±0.01	86.38±0.02	86.31±0.00	86.03±0.02	82.55±0.02	82.43±0.03	83.28±0.02	82.45±0.03	82.60±0.02	82.47±0.03	82.60±0.02	82.43±0.03	82.27±0.02	82.26±0.03	83.45±0.02	79.87±0.02	83.51±0.02	83.45±0.02	83.23±0.02	81.82±0.02	85.22±0.02	83.68±0.02
table1_171	74.5	473	73.67±0.00	73.89±0.01	73.82±0.00	73.70±0.01	70.80±0.01	70.79±0.01	71.68±0.01	71.04±0.01	70.84±0.02	70.82±0.02	70.98±0.02	70.91±0.02	70.59±0.02	70.66±0.02	71.81±0.01	68.80±0.01	71.68±0.01	71.71±0.01	71.52±0.01	70.39±0.01	73.24±0.01	72.00±0.01
table1_172	76.93	557	77.99±0.00	77.77±0.01	78.16±0.00	77.62±0.01	75.62±0.01	75.71±0.02	76.13±0.01	75.04±0.01	75.47±0.02	75.37±0.02	75.53±0.02	75.29±0.02	75.13±0.01	75.11±0.01	76.14±0.01	72.17±0.01	76.18±0.01	75.90±0.01	75.71±0.01	73.80±0.01	77.53±0.01	75.45±0.01
table1_173	75.04	429	74.42±0.00	74.58±0.01	74.50±0.00	74.25±0.01	72.84±0.01	72.39±0.02	73.55±0.01	72.32±0.02	72.95±0.02	72.45±0.02	72.96±0.02	72.41±0.02	72.08±0.02	71.70±0.02	73.17±0.01	70.07±0.02	74.04±0.02	73.51±0.02	72.96±0.01	71.55±0.02	74.67±0.01	73.15±0.02
table1_174	72.81	473	72.67±0.00	72.99±0.01	72.77±0.00	72.62±0.01	71.00±0.01	70.30±0.03	71.96±0.01	70.39±0.03	71.59±0.02	70.81±0.03	71.51±0.01	70.66±0.03	70.94±0.01	70.40±0.03	71.48±0.01	68.31±0.02	71.56±0.01	70.98±0.03	70.76±0.01	69.33±0.02	72.39±0.01	70.86±0.02
table1_175	84.15	557	83.46±0.00	83.96±0.07	83.51±0.00	83.53±0.06	80.48±0.01	81.16±0.07	80.61±0.01	80.00±0.04	80.40±0.02	80.90±0.07	80.46±0.01	80.75±0.06	79.89±0.01	80.51±0.07	81.18±0.01	77.78±0.02	80.77±0.01	81.09±0.06	80.59±0.01	79.33±0.02	82.51±0.01	81.13±0.02
table1_177	98.66	249	98.65±0.01	98.66±0.03	98.69±0.00	98.25±0.02	94.27±0.01	94.01±0.03	94.89±0.01	93.85±0.03	94.31±0.02	94.02±0.03	94.22±0.02	93.90±0.03	93.86±0.02	93.75±0.03	95.16±0.02	91.00±0.02	95.47±0.02	95.28±0.03	95.00±0.02	93.30±0.02	97.27±0.02	95.40±0.02
table1_179	62.29	343	61.02±0.00	61.36±0.01	61.34±0.00	61.37±0.01	58.98±0.01	58.95±0.01	60.05±0.01	59.45±0.01	58.97±0.02	58.91±0.02	59.26±0.01	59.16±0.02	58.67±0.01	58.73±0.01	60.17±0.01	57.60±0.01	59.94±0.01	59.97±0.01	59.80±0.01	58.87±0.01	61.26±0.01	60.23±0.01
table1_180	65.59	553	65.30±0.00	65.29±0.01	65.65±0.00	65.38±0.01	63.73±0.01	63.88±0.02	64.44±0.01	63.50±0.02	63.54±0.02	63.51±0.02	63.73±0.02	63.55±0.02	63.06±0.01	63.15±0.02	64.42±0.01	61.09±0.01	64.38±0.01	64.20±0.01	63.97±0.01	62.41±0.01	65.53±0.01	63.82±0.01
table1_187	59.05	503	59.35±0.00	59.46±0.03	59.32±0.00	57.62±0.01	59.79±0.00	59.00±0.04	57.31±0.01	54.25±0.02	60.15±0.01	59.17±0.04	58.06±0.01	56.84±0.02	58.03±0.00	57.38±0.03	59.32±0.01	57.13±0.03	59.02±0.01	58.11±0.04	57.13±0.01	55.98±0.02	58.70±0.01	57.45±0.03
table1_209	51.49	449	51.49±0.00	52.15±0.02	51.61±0.00	51.32±0.01	51.18±0.01	51.08±0.02	50.38±0.01	49.17±0.02	51.40±0.01	51.23±0.02	50.68±0.01	50.44±0.02	50.83±0.01	50.78±0.02	50.74±0.01	48.72±0.02	50.64±0.01	50.54±0.02	50.64±0.01	49.79±0.02	51.91±0.01	50.98±0.02
table1_211	54.19	314	49.90±0.00	50.27±0.02	49.83±0.00	49.58±0.01	52.61±0.01	52.33±0.03	49.73±0.02	48.66±0.02	51.99±0.02	51.66±0.03	51.05±0.02	50.73±0.03	51.84±0.03	51.68±0.03	50.38±0.01	48.36±0.02	50.45±0.01	50.16±0.02	51.31±0.02	50.31±0.02	52.56±0.02	51.48±0.02
table1_214	34.62	537	34.26±0.00	34.41±0.01	34.28±0.00	34.29±0.00	34.28±0.01	34.69±0.02	33.81±0.01	33.50±0.01	34.09±0.01	34.35±0.02	34.00±0.01	34.16±0.02	34.11±0.01	34.44±0.02	34.23±0.01	32.52±0.01	34.03±0.01	34.14±0.01	34.37±0.01	33.61±0.01	35.26±0.01	34.43±0.01
table1_229	28.48	761	27.98±0.00	28.22±0.01	27.94±0.00	27.76±0.00	28.42±0.00	28.84±0.02	28.24±0.01	27.61±0.01	27.86±0.01	28.12±0.02	28.34±0.01	28.43±0.02	27.18±0.01	27.38±0.02	27.89±0.01	26.78±0.01	27.63±0.01	27.68±0.02	27.78±0.01	27.25±0.01	28.42±0.01	27.86±0.01
table1_230	22.88	755	22.73±0.00	22.75±0.01	22.70±0.00	22.56±0.00	23.21±0.01	23.84±0.03	23.33±0.01	23.04±0.02	22.99±0.01	23.46±0.02	23.31±0.01	23.61±0.02	21.81±0.01	22.29±0.03	22.53±0.01	22.00±0.02	22.88±0.02	23.25±0.03	22.80±0.01	22.57±0.01	23.34±0.01	23.09±0.01
table1_235	71.26	209	72.68±0.00	73.12±0.04	72.78±0.00	72.89±0.03	73.93±0.02	71.57±0.08	74.07±0.01	71.38±0.08	75.54±0.03	72.98±0.09	74.35±0.02	71.96±0.08	75.18±0.02	72.91±0.07	75.67±0.01	72.81±0.09	75.93±0.02	73.66±0.08	74.43±0.02	72.12±0.08	75.97±0.02	73.59±0.08
table1_243	96.7	329	95.75±0.00	95.61±0.03	95.69±0.00	94.92±0.03	97.84±0.01	93.69±0.06	96.75±0.02	91.91±0.06	97.76±0.02	93.62±0.06	97.14±0.02	93.05±0.05	97.15±0.02	93.45±0.06	96.91±0.02	90.67±0.05	96.77±0.02	93.03±0.05	96.55±0.02	91.96±0.05	98.64±0.02	93.83±0.05
table1_244	109.66	329	108.61±0.01	107.87±0.03	108.42±0.00	107.15±0.02	112.22±0.01	106.62±0.06	109.71±0.02	103.73±0.06	111.91±0.03	106.35±0.07	110.61±0.03	105.22±0.07	110.90±0.03	105.93±0.06	110.71±0.02	102.67±0.06	110.58±0.02	105.47±0.06	110.37±0.03	104.20±0.06	112.80±0.03	106.33±0.06
table1_261	63.43	377	62.72±0.00	63.16±0.02	63.01±0.00	62.95±0.01	61.51±0.01	61.38±0.02	61.86±0.01	60.81±0.02	61.68±0.02	61.41±0.02	61.65±0.02	61.28±0.02	61.78±0.02	61.81±0.02	62.31±0.01	59.23±0.01	61.89±0.01	61.85±0.02	61.87±0.01	60.50±0.01	63.37±0.01	61.87±0.01
table1_281	33.54	489	33.22±0.00	33.45±0.01	33.28±0.00	33.18±0.01	32.70±0.00	32.41±0.01	32.73±0.01	31.97±0.01	32.28±0.01	31.96±0.01	32.39±0.01	32.04±0.01	30.60±0.01	30.27±0.02	32.24±0.01	31.20±0.01	32.39±0.01	31.95±0.02	32.35±0.01	31.78±0.02	33.10±0.01	32.50±0.02
table1_282	96.16	353	95.66±0.01	95.57±0.04	95.56±0.00	94.79±0.03	96.94±0.01	93.15±0.04	96.27±0.01	91.62±0.04	97.08±0.02	93.29±0.04	96.61±0.02	92.81±0.04	96.74±0.02	93.30±0.04	96.31±0.01	90.38±0.04	96.25±0.02	92.83±0.04	96.08±0.02	91.80±0.03	98.14±0.02	93.66±0.03
table1_286	95.62	342	95.72±0.02	95.63±0.03	95.96±0.00	93.78±0.01	97.24±0.01	95.78±0.03	95.55±0.01	91.62±0.02	97.01±0.02	95.28±0.03	96.87±0.02	94.90±0.03	93.92±0.01	92.68±0.03	96.01±0.01	93.36±0.03	95.96±0.01	94.33±0.03	95.21±0.01	93.71±0.03	97.77±0.01	96.16±0.03
table1_287	70.39	425	72.29±0.00	72.59±0.03	72.41±0.00	72.31±0.02	73.24±0.01	70.56±0.04	73.55±0.01	70.40±0.04	74.56±0.02	71.68±0.04	73.67±0.02	70.93±0.04	74.24±0.02	71.66±0.04	74.64±0.01	71.31±0.04	74.82±0.02	72.21±0.04	73.51±0.02	70.82±0.04	75.04±0.02	72.25±0.04
table1_294	124.78	195	124.53±0.01	124.13±0.03	124.76±0.00	124.28±0.03	121.89±0.02	121.22±0.03	125.06±0.01	124.01±0.04	122.47±0.02	121.78±0.03	121.93±0.02	121.19±0.03	122.41±0.02	121.95±0.02	123.31±0.01	122.12±0.03	124.53±0.02	124.06±0.03	121.67±0.02	120.98±0.03	124.57±0.02	123.84±0.03
table1_295	74.23	357	74.74±0.00	75.51±0.02	74.92±0.00	74.76±0.02	75.50±0.01	73.23±0.06	75.62±0.01	72.05±0.05	75.09±0.03	72.83±0.06	75.24±0.03	72.82±0.06	74.86±0.02	72.87±0.06	74.81±0.02	70.74±0.05	74.73±0.03	72.73±0.06	74.50±0.02	71.69±0.06	76.03±0.03	73.11±0.06
table1_299	71.87	633	70.88±0.00	71.15±0.01	71.05±0.00	70.85±0.01	68.62±0.01	68.55±0.02	68.92±0.02	67.92±0.02	68.77±0.02	68.60±0.02	68.75±0.02	68.46±0.02	68.59±0.01	68.61±0.02	69.34±0.01	66.02±0.01	68.95±0.01	68.88±0.02	68.86±0.01	67.43±0.01	70.51±0.01	68.95±0.01
table1_300	42.51	449	43.19±0.00	43.40±0.01	43.32±0.00	43.18±0.01	43.43±0.01	42.89±0.02	43.22±0.01	41.97±0.02	43.58±0.01	43.00±0.02	43.48±0.01	42.74±0.02	43.09±0.01	42.45±0.02	43.21±0.01	41.18±0.02	43.55±0.01	42.80±0.02	43.15±0.01	42.11±0.02	44.20±0.01	43.10±0.02
table1_305	64.65	359	64.97±0.00	65.48±0.03	65.51±0.00	65.17±0.02	64.74±0.01	62.77±0.05	65.50±0.01	62.39±0.05	64.72±0.02	62.78±0.05	65.06±0.02	62.97±0.05	63.17±0.01	61.49±0.04	63.89±0.01	60.73±0.04	64.44±0.02	62.67±0.04	63.69±0.02	61.62±0.04	65.00±0.02	62.85±0.04
table1_307	55.54	501	56.03±0.00	57.53±0.02	56.52±0.00	56.92±0.02	56.11±0.02	55.36±0.05	56.76±0.01	54.42±0.04	55.53±0.02	54.80±0.05	56.15±0.02	55.06±0.05	53.95±0.02	53.71±0.04	55.62±0.01	52.82±0.03	54.88±0.02	54.35±0.04	55.07±0.02	53.50±0.04	56.22±0.02	54.59±0.04
table1_309	59.18	377	58.26±0.00	58.83±0.02	58.59±0.00	58.76±0.01	56.63±0.01	56.90±0.02	57.02±0.01	56.26±0.02	56.70±0.02	56.81±0.02	56.81±0.01	56.76±0.02	56.44±0.01	56.81±0.02	57.55±0.01	54.75±0.01	57.06±0.01	57.23±0.02	57.03±0.01	55.91±0.01	58.40±0.01	57.17±0.01
table1_311	112.36	237	107.40±0.01	107.14±0.05	107.77±0.00	106.30±0.04	110.30±0.02	103.53±0.09	109.93±0.02	101.92±0.08	109.20±0.04	102.76±0.08	109.78±0.04	103.08±0.09	108.19±0.03	102.13±0.08	109.62±0.02	101.15±0.09	110.46±0.04	103.97±0.09	110.62±0.03	103.36±0.09	112.86±0.03	105.33±0.10
table1_313	72.41	239	72.83±0.00	73.17±0.02	72.86±0.00	72.58±0.01	72.74±0.02	72.23±0.02	71.99±0.02	70.51±0.02	71.83±0.02	71.26±0.03	71.97±0.02	71.38±0.03	69.84±0.03	69.53±0.03	72.35±0.01	69.57±0.03	73.06±0.01	72.49±0.03	71.68±0.02	70.35±0.02	73.35±0.02	71.91±0.02
table1_314	59.52	209	59.06±0.00	59.29±0.02	58.92±0.00	58.95±0.01	57.65±0.01	58.40±0.03	57.07±0.01	56.86±0.02	57.41±0.02	57.99±0.03	57.20±0.02	57.62±0.03	57.35±0.01	57.96±0.02	57.59±0.01	55.26±0.02	57.56±0.01	57.90±0.02	57.73±0.01	56.85±0.02	59.15±0.01	58.19±0.02
table1_318	65.39	503	64.53±0.00	65.30±0.04	64.19±0.00	64.56±0.03	62.23±0.01	63.32±0.05	61.16±0.01	61.16±0.03	61.94±0.01	62.89±0.04	61.74±0.01	62.49±0.04	61.55±0.02	62.49±0.04	62.20±0.01	60.09±0.02	61.79±0.01	62.47±0.03	62.22±0.01	61.71±0.02	63.73±0.01	63.16±0.02
table1_321	53.78	333	52.93±0.00	53.24±0.01	53.33±0.00	53.33±0.01	51.79±0.01	51.60±0.02	52.80±0.01	52.04±0.02	51.73±0.02	51.50±0.02	51.98±0.02	51.71±0.02	51.82±0.01	51.77±0.01	52.97±0.01	50.55±0.01	52.71±0.01	52.64±0.01	52.63±0.01	51.66±0.01	53.93±0.01	52.86±0.01
table1_325	65.59	349	68.04±0.00	69.29±0.04	68.57±0.00	68.20±0.03	66.25±0.01	64.91±0.05	67.48±0.01	64.38±0.05	65.09±0.02	63.84±0.05	66.58±0.02	65.06±0.05	65.65±0.02	64.49±0.06	66.91±0.01	64.14±0.05	66.00±0.02	64.91±0.05	66.87±0.02	65.28±0.05	68.30±0.02	66.64±0.05
table1_326	83.68	197	83.01±0.00	83.41±0.04	83.07±0.00	82.76±0.03	83.71±0.01	80.86±0.08	83.85±0.02	80.08±0.08	83.72±0.03	80.89±0.08	83.74±0.03	80.85±0.08	83.43±0.03	80.91±0.08	83.21±0.02	78.67±0.07	83.04±0.03	80.56±0.07	82.79±0.03	79.67±0.07	84.54±0.03	81.27±0.08
table1_330	70.72	292	70.39±0.00	71.08±0.03	70.67±0.00	69.87±0.01	72.92±0.01	71.62±0.03	71.23±0.01	68.27±0.03	72.16±0.01	70.71±0.03	72.08±0.01	70.44±0.03	70.49±0.01	69.20±0.03	71.42±0.01	69.23±0.03	71.59±0.02	70.06±0.04	71.60±0.01	70.16±0.03	73.53±0.01	72.02±0.04
table1_331	68.02	501	68.37±0.01	68.92±0.03	68.58±0.00	67.36±0.01	67.99±0.01	66.06±0.03	70.00±0.01	66.04±0.02	68.42±0.02	66.26±0.03	70.07±0.02	67.58±0.03	68.29±0.02	65.98±0.03	74.02±0.02	69.92±0.05	70.92±0.02	68.13±0.04	73.58±0.02	70.22±0.05	75.43±0.02	71.90±0.05
table1_338	58.31	281	57.95±0.00	58.42±0.02	58.32±0.00	57.65±0.01	56.74±0.01	56.34±0.03	57.38±0.01	55.48±0.03	56.82±0.02	56.35±0.04	56.99±0.02	56.28±0.03	56.02±0.01	55.79±0.03	57.30±0.01	54.57±0.03	57.09±0.02	56.77±0.03	56.75±0.02	55.49±0.03	58.14±0.02	56.78±0.03
table1_340	87.73	297	87.34±0.01	87.64±0.03	87.40±0.00	86.88±0.02	89.12±0.02	86.19±0.08	88.41±0.02	84.13±0.07	88.90±0.03	85.86±0.08	88.55±0.03	85.37±0.07	88.49±0.03	85.79±0.08	88.26±0.02	82.87±0.06	88.31±0.03	85.48±0.07	88.09±0.03	84.22±0.07	89.95±0.03	85.90±0.07
table2_1	42.18	439	40.65±0.00	40.84±0.01	41.05±0.00	40.98±0.00	39.95±0.01	39.64±0.01	41.54±0.01	40.73±0.01	40.20±0.01	39.83±0.01	40.51±0.01	40.11±0.01	40.40±0.01	40.23±0.01	41.70±0.01	39.68±0.01	41.39±0.01	41.22±0.01	41.47±0.01	40.60±0.01	42.53±0.01	41.58±0.01
table2_3	110.88	329	111.42±0.02	111.84±0.07	112.05±0.00	109.77±0.05	113.06±0.02	107.54±0.08	112.00±0.01	103.80±0.07	113.75±0.03	108.00±0.08	113.06±0.02	106.98±0.08	114.43±0.03	108.54±0.08	118.65±0.02	110.07±0.10	117.05±0.03	110.67±0.09	116.99±0.02	109.83±0.09	119.73±0.02	112.25±0.10
table2_5	69.71	357	71.11±0.00	71.82±0.03	71.30±0.00	71.37±0.02	71.19±0.01	68.68±0.05	71.90±0.01	68.57±0.06	71.50±0.02	68.95±0.06	71.50±0.02	68.93±0.06	71.31±0.02	69.03±0.05	71.45±0.01	67.92±0.06	71.34±0.02	69.07±0.05	70.60±0.02	68.04±0.06	72.05±0.02	69.40±0.06
table2_12	69.1	314	68.62±0.00	69.28±0.03	69.01±0.00	68.90±0.03	69.59±0.02	67.55±0.05	69.41±0.01	66.50±0.04	68.90±0.02	66.97±0.04	69.20±0.02	67.16±0.04	67.06±0.02	65.51±0.04	68.88±0.01	65.15±0.04	67.75±0.02	66.27±0.03	68.37±0.02	66.03±0.04	69.85±0.02	67.39±0.04
table2_14	69.64	279	69.11±0.00	69.65±0.02	68.75±0.00	68.39±0.02	68.09±0.01	67.98±0.03	67.62±0.01	66.39±0.02	68.10±0.02	67.90±0.03	68.08±0.02	67.78±0.03	67.15±0.01	67.06±0.02	68.38±0.01	66.64±0.03	68.33±0.01	68.08±0.03	67.89±0.01	67.20±0.02	69.64±0.01	68.88±0.02
table2_16	99.88	233	100.16±0.01	100.23±0.04	100.07±0.00	99.49±0.03	103.42±0.02	99.67±0.12	101.49±0.02	96.67±0.09	103.25±0.03	99.36±0.12	102.22±0.03	98.31±0.11	102.58±0.03	99.12±0.10	102.24±0.02	95.68±0.08	102.36±0.02	98.68±0.10	102.23±0.02	97.33±0.09	104.45±0.02	99.32±0.09
table2_21	67.15	209	65.40±0.00	65.48±0.01	65.78±0.00	65.52±0.01	64.00±0.02	63.50±0.02	64.91±0.02	63.82±0.02	63.91±0.03	63.38±0.03	64.10±0.02	63.54±0.02	63.84±0.02	63.53±0.02	65.04±0.02	62.02±0.02	64.79±0.02	64.46±0.02	64.72±0.02	63.35±0.02	66.30±0.02	64.82±0.02
table2_23	87.73	197	87.38±0.01	87.56±0.04	87.48±0.00	86.90±0.03	89.61±0.03	86.78±0.11	88.38±0.02	84.18±0.09	88.97±0.03	86.02±0.11	88.47±0.03	85.40±0.10	88.37±0.03	85.76±0.10	88.37±0.02	82.93±0.08	88.29±0.03	85.46±0.10	88.06±0.03	84.14±0.09	89.93±0.03	85.82±0.09
table2_29	77.74	297	77.56±0.01	78.04±0.03	77.99±0.00	77.70±0.02	78.47±0.01	75.78±0.08	78.01±0.01	74.37±0.07	78.14±0.02	75.51±0.07	77.92±0.02	75.21±0.07	76.21±0.02	73.97±0.06	77.16±0.01	72.83±0.07	77.45±0.02	75.08±0.07	76.89±0.02	73.93±0.07	78.52±0.02	75.43±0.07
table2_40	51.29	449	51.02±0.00	51.46±0.03	50.84±0.00	50.31±0.01	50.50±0.01	50.33±0.02	49.39±0.01	48.09±0.02	50.83±0.01	50.58±0.03	49.72±0.01	49.35±0.02	49.88±0.01	49.75±0.02	50.72±0.01	49.09±0.02	50.52±0.01	50.28±0.02	49.54±0.01	48.83±0.01	50.84±0.01	50.07±0.01
table2_42	87.93	431	87.18±0.00	87.13±0.01	87.15±0.00	86.37±0.01	84.81±0.01	83.95±0.02	85.43±0.01	83.56±0.02	84.96±0.02	84.02±0.03	84.97±0.02	83.99±0.03	83.99±0.02	83.23±0.02	85.81±0.01	82.02±0.02	85.74±0.01	84.76±0.02	84.73±0.01	82.87±0.02	86.79±0.01	84.79±0.02
table2_43	57.56	375	57.21±0.00	57.91±0.02	57.39±0.00	56.55±0.01	58.62±0.00	57.81±0.03	57.74±0.01	55.40±0.02	58.39±0.01	57.43±0.03	58.25±0.01	57.19±0.03	56.49±0.00	55.81±0.02	57.77±0.01	56.09±0.03	57.14±0.01	56.26±0.03	57.32±0.01	56.42±0.02	58.90±0.01	57.93±0.02
table2_45	62.42	279	61.72±0.00	62.03±0.01	62.03±0.00	61.92±0.01	61.19±0.01	60.57±0.02	61.96±0.01	60.57±0.02	61.13±0.02	60.46±0.02	61.26±0.02	60.52±0.02	59.98±0.02	59.49±0.02	61.62±0.01	58.71±0.02	62.16±0.02	61.49±0.02	61.24±0.01	59.86±0.02	62.68±0.01	61.19±0.02
table2_51	44	503	44.08±0.00	44.66±0.02	44.17±0.00	43.57±0.01	44.86±0.00	44.43±0.02	44.50±0.01	42.85±0.01	44.90±0.01	44.36±0.03	44.75±0.01	44.12±0.02	43.43±0.00	43.08±0.02	44.39±0.00	43.03±0.02	43.81±0.01	43.31±0.02	43.91±0.01	43.25±0.02	45.10±0.01	44.38±0.02
table2_61	120.39	209	120.15±0.02	119.63±0.04	120.61±0.00	117.34±0.02	122.04±0.02	118.33±0.05	121.14±0.02	114.39±0.04	121.79±0.03	117.72±0.05	122.80±0.02	118.35±0.05	120.07±0.03	116.35±0.05	125.90±0.01	120.12±0.07	123.84±0.03	119.45±0.06	126.05±0.02	121.35±0.06	129.33±0.02	124.37±0.06
table2_64	22	899	22.02±0.00	22.12±0.01	22.01±0.00	22.02±0.00	22.32±0.00	22.77±0.02	21.76±0.00	21.61±0.01	22.18±0.01	22.49±0.02	22.10±0.01	22.32±0.01	22.18±0.00	22.53±0.01	22.16±0.00	20.97±0.00	21.90±0.00	22.02±0.01	22.41±0.00	21.82±0.00	23.01±0.00	22.37±0.00
table2_70	87.46	503	86.27±0.00	86.13±0.01	86.33±0.00	85.86±0.01	82.97±0.01	82.63±0.02	83.76±0.01	82.75±0.02	82.98±0.02	82.64±0.02	83.10±0.01	82.71±0.02	82.60±0.02	82.33±0.02	83.87±0.01	80.24±0.01	83.80±0.01	83.48±0.02	83.58±0.01	82.01±0.01	85.59±0.01	83.88±0.01
table2_76	96.84	439	95.77±0.00	95.61±0.02	95.70±0.00	94.91±0.02	98.00±0.01	93.70±0.06	97.00±0.01	92.05±0.06	98.11±0.02	93.80±0.06	97.49±0.02	93.25±0.06	97.58±0.02	93.68±0.05	97.26±0.01	90.87±0.05	97.14±0.01	93.24±0.05	96.99±0.02	92.21±0.05	99.10±0.02	94.09±0.05
table2_81	55.47	501	55.41±0.00	56.02±0.02	55.43±0.00	54.71±0.01	54.88±0.01	53.53±0.03	56.88±0.01	53.94±0.03	55.51±0.01	53.96±0.03	56.82±0.01	55.02±0.03	55.43±0.01	53.73±0.03	59.80±0.02	56.53±0.04	57.22±0.01	55.16±0.03	59.28±0.02	56.69±0.04	60.75±0.02	58.03±0.04
table2_85	36.44	292	36.06±0.00	36.12±0.01	36.08±0.00	36.06±0.01	37.17±0.02	37.71±0.04	37.29±0.01	37.03±0.02	37.37±0.01	37.69±0.04	37.13±0.01	37.34±0.03	35.90±0.01	36.29±0.03	36.49±0.01	36.04±0.02	36.98±0.01	37.30±0.03	36.63±0.01	36.44±0.02	37.52±0.01	37.31±0.02
water	9.92	2557	5.86±0.00	5.90±0.00	9.79±0.00	9.71±0.00	9.77±0.00	10.29±0.01	9.83±0.00	9.72±0.00	9.72±0.00	10.18±0.01	9.84±0.00	9.97±0.00	9.88±0.00	9.89±0.00	9.94±0.00	9.75±0.00	9.89±0.00	9.76±0.00	9.90±0.00	9.80±0.00	10.18±0.00	10.06±0.00
